# Supplementary material
Source: publisher figshare collection journal article supplement (https://karger.figshare.com/ndownloader/files/28409784)
Supplement: Supplementary file 1 [file 28409784]

**S. Table 10.** Recent Meta-Analyses of COVID-19 Involvement in Kidney Impairment

|  | Date | Sample | Primary Outcomes | Strength | Limitations |
| --- | --- | --- | --- | --- | --- |
| Yang et al86 | Jun 2020 | 4,963  COVID-19 patients | AKI based on sCr, BUN, proteinuria | Assessed risk of AKI in severely ill patients and non-survivors | Patients strictly from China; limited comorbidity analysis |
| Brienza et al87 | Jul 2020 | 5,116  COVID-19 patients | Mortality and AKI | Cases in USA and China; accounted for comorbidities | Variable AKI definition |
| Kunutsor et al88 | Jul 2020 | 17,391  COVID-19 patients | Renal Complication | Accounted for pre-existing renal conditions | No defined CKD and classification; patients mainly from China |
| Hansrivijit et al89 | Jul 2020 | 5,497  COVID-19 patients | Mortality and AKI | Accounted for pre-existing conditions; noted effect of HTN and diabetes | Patients mainly from China; stages of AKI not considered |
| Lim et al90 | Jul 2020 | 3615 adult  COVID-19 patients | Mortality and AKI | Accounted for coagulopathy | High risk of bias in included studies; varied definition of COVID-19; patients mainly from China |
| Shao et al91 | Jul 2020 | 24,527  COVID-19 patients | Fatality and AKI | Focus on reports with severe infection | High risk of publication bias noted |
| Robbins-Juarez et al92 | Jun 2020 | 13,137 hospitalized  COVID-19 patients | Mortality and AKI | Patients from Asia, Europe, and USA; one definition for AKI (KDIGO) | Did not account for comorbidities |
| Zhang et al93 | Aug 2020 | 789  COVID-19 patients | Fatality | Considered discharge rate; accounted for pre-existing AKI | Small sample size |
| Fu et al94 | Sep 2020 | 49,048  Hospitalized COVID-19 patients | AKI and use of KRT | Patients from Asia, Europe, and USA | Did not account for comorbidities |
| WU et al95 | Jul 2020 | 171,108  COVID-19 patients | Severe Illness and Comorbidities | Large sample size; broad view of organ involvement | Patients mainly from China; limited depth of renal involvement |

AKI, acute kidney injury; BUN, blood urea nitrogen; KRT, kidney replacement therapy; sCr, serum creatinine.
